# Supplementary material for: Hyperleucinemia causes hippocampal retromer deficiency linking diabetes to Alzheimer's disease
Source: PubMed Central journal article supplement — Neurobiol Dis. Author manuscript; Available in PMC 2014 Nov 18. (PMC4235335; doi:10.1016/j.nbd.2013.12.017), 2014-01-14
Supplement: NIHMS580638-supplement-Supplemental_Data.pdf [file NIHMS580638-supplement-Supplemental_Data.pdf]

**Supplementary Table 1.** Composition of control and high leucine diets.

|                                       | Control           |               | High Leucine Diet |               |
|---------------------------------------|-------------------|---------------|-------------------|---------------|
|                                       | gm%               | kcal%         | gm%               | kcal%         |
| Protein                               | 19.9              | 23.2          | 29.1              | 33.3          |
| Carbohydrate                          | 62.5              | 71.1          | 55.4              | 61.8          |
| Fat                                   | 6.4               | 5.7           | 5.6               | 4.9           |
| <b>Total</b>                          | <b>3.52kcal/g</b> | <b>100%</b>   | <b>3.59kcal/g</b> | <b>100%</b>   |
| Ingredient                            | Control           |               | High Leucine Diet |               |
|                                       | gm                | kcal          | gm                | kcal          |
| Casein                                | 200               | 820           | 200               | 820           |
| L-Cystine                             | 3                 | 12.3          | 3                 | 12.3          |
| L-Leucine                             | 15.8              | 64.8          | 158               | 648           |
| Corn Starch                           | 356               | 1460          | 356               | 1460          |
| Maltodextrin 10                       | 45                | 184.5         | 45                | 184.5         |
| Dextrose                              | 250               | 1025          | 250               | 1025          |
| Cellulose (BW200)                     | 75                | 0             | 75                | 0             |
| Inulin                                | 25                | 37.5          | 25                | 37.5          |
| Soybean Oil                           | 70                | 220           | 70                | 220           |
| Mineral Mix S10026                    | 10                | 0             | 10                | 0             |
| Dicalcium Phosphate                   | 13                | 0             | 13                | 0             |
| Calcium Carbonate                     | 5.5               | 0             | 5.5               | 0             |
| Potassium Citrate, 1 H <sub>2</sub> O | 16.5              | 0             | 16.5              | 0             |
| Vitamin Mix V10001                    | 10                | 40            | 10                | 40            |
| Choline Bitartrate                    | 2                 | 0             | 2                 | 0             |
| FD&C Blue Dye #1                      | 0.025             | 0             | -----             | -----         |
| FD&C Yellow Dye #5                    | 0.025             | 0             | 0.025             | 0             |
| FD&C Red Dye #40                      | -----             | -----         | 0.025             | 0             |
| <b>Total</b>                          | <b>1096.85</b>    | <b>3864.1</b> | <b>1239.05</b>    | <b>4447.3</b> |

**Supplementary Table 2.** Plasma amino acid concentrations in *ob/ob* and wild-type control mice. (n=5)

| Amino Acid    | <u>+/+</u> |        | <u>ob/ob</u> |        | P value               |
|---------------|------------|--------|--------------|--------|-----------------------|
|               | Mean       | SD     | Mean         | SD     |                       |
| Alanine       | 890.3 +/-  | 240.7  | 1106.1 +/-   | 307.1  | 0.25119               |
| Arginine      | 74.8 +/-   | 43.3   | 53.8 +/-     | 35.0   | 0.42247               |
| Asparagine    | 56.0 +/-   | 18.1   | 73.6 +/-     | 36.1   | 0.35943               |
| Aspartic Acid | 29.6 +/-   | 22.1   | 26.8 +/-     | 11.0   | 0.80726               |
| Citrulline    | 94.4 +/-   | 18.5   | 99.4 +/-     | 14.7   | 0.65304               |
| Cysteine      | 43.2 +/-   | 19.8   | 30.7 +/-     | 13.5   | 0.27594               |
| Glutamic Acid | 86.2 +/-   | 98.7   | 161.5 +/-    | 147.1  | 0.36973               |
| Glutamine     | 798.7 +/-  | 210.7  | 865.7 +/-    | 119.1  | 0.55299               |
| Glycine       | 367.0 +/-  | 120.2  | 340.4 +/-    | 130.1  | 0.74497               |
| Histidine     | 80.2 +/-   | 15.0   | 102.0 +/-    | 23.0   | 0.11460               |
| Isoleucine    | 114.5 +/-  | 28.4   | 181.9 +/-    | 27.6   | <b><u>0.00526</u></b> |
| Leucine       | 195.8 +/-  | 39.4   | 324.1 +/-    | 63.6   | <b><u>0.00497</u></b> |
| Lysine        | 320.3 +/-  | 59.4   | 340.3 +/-    | 54.4   | 0.59256               |
| Methionine    | 47.7 +/-   | 5.0    | 93.1 +/-     | 22.8   | <b><u>0.00244</u></b> |
| Ornithine     | 101.7 +/-  | 77.1   | 171.5 +/-    | 52.4   | 0.13237               |
| Phenylalanine | 84.8 +/-   | 17.5   | 140.5 +/-    | 24.4   | <b><u>0.00324</u></b> |
| Proline       | 114.4 +/-  | 37.8   | 158.5 +/-    | 58.3   | 0.19361               |
| Serine        | 132.5 +/-  | 25.6   | 160.6 +/-    | 51.6   | 0.30672               |
| Taurine       | 1456.9 +/- | 1354.7 | 2405.2 +/-   | 1562.8 | 0.33527               |
| Threonine     | 152.6 +/-  | 27.9   | 163.8 +/-    | 28.7   | 0.54925               |
| Tryptophan    | 22.4 +/-   | 3.2    | 44.2 +/-     | 7.0    | <b><u>0.00023</u></b> |
| Tyrosine      | 73.6 +/-   | 14.4   | 99.5 +/-     | 25.1   | 0.07987               |
| Urea          | 7494.7 +/- | 1156.3 | 14106.6 +/-  | 644.0  | <b><u>0.00000</u></b> |
| Valine        | 255.7 +/-  | 46.7   | 494.9 +/-    | 93.2   | <b><u>0.00090</u></b> |

**Supplementary Table 3.** Plasma amino acid concentrations in *db/db* and wild-type control mice. (n=5)

| Amino Acid    | <u>+/+</u> |           | <u>db/db</u> |            | P value        |
|---------------|------------|-----------|--------------|------------|----------------|
|               | Mean       | SD        | Mean         | SD         |                |
| Alanine       | 798.1      | +/- 197.0 | 1016.3       | +/- 349.9  | 0.27271        |
| Arginine      | 110.9      | +/- 25.0  | 61.4         | +/- 20.9   | <b>0.01583</b> |
| Asparagine    | 56.3       | +/- 16.3  | 55.7         | +/- 14.9   | 0.95667        |
| Aspartic Acid | 22.3       | +/- 3.8   | 21.9         | +/- 4.4    | 0.88658        |
| Citrulline    | 110.2      | +/- 12.1  | 107.5        | +/- 28.8   | 0.85104        |
| Cysteine      | 53.3       | +/- 14.9  | 31.6         | +/- 6.2    | <b>0.03040</b> |
| Glutamic Acid | 67.9       | +/- 41.0  | 57.2         | +/- 20.6   | 0.65106        |
| Glutamine     | 704.3      | +/- 142.8 | 728.2        | +/- 111.6  | 0.79248        |
| Glycine       | 322.6      | +/- 43.0  | 230.3        | +/- 46.6   | <b>0.01764</b> |
| Histidine     | 80.1       | +/- 6.6   | 88.0         | +/- 8.8    | 0.16342        |
| Isoleucine    | 104.7      | +/- 11.6  | 221.4        | +/- 52.0   | <b>0.00166</b> |
| Leucine       | 189.6      | +/- 20.9  | 336.5        | +/- 63.0   | <b>0.00163</b> |
| Lysine        | 309.4      | +/- 48.6  | 266.0        | +/- 43.1   | 0.20435        |
| Methionine    | 73.4       | +/- 14.7  | 77.1         | +/- 48.5   | 0.87456        |
| Ornithine     | 70.2       | +/- 12.1  | 98.8         | +/- 55.0   | 0.28790        |
| Phenylalanine | 83.3       | +/- 7.8   | 131.9        | +/- 8.1    | <b>0.00004</b> |
| Proline       | 117.7      | +/- 23.9  | 120.0        | +/- 53.9   | 0.93195        |
| Serine        | 143.7      | +/- 16.1  | 129.0        | +/- 22.4   | 0.28639        |
| Taurine       | 1169.0     | +/- 616.8 | 1660.8       | +/- 427.8  | 0.21965        |
| Threonine     | 172.1      | +/- 18.1  | 156.4        | +/- 44.6   | 0.49308        |
| Tryptophan    | 21.7       | +/- 3.6   | 30.7         | +/- 5.6    | <b>0.02127</b> |
| Tyrosine      | 75.2       | +/- 9.3   | 103.7        | +/- 16.5   | <b>0.01324</b> |
| Urea          | 8589.6     | +/- 647.7 | 9291.7       | +/- 1478.4 | 0.36674        |
| Valine        | 268.3      | +/- 21.8  | 507.0        | +/- 127.9  | <b>0.00419</b> |

**Supplementary Table 4.** Plasma amino acid concentrations in  $A^y/+$  and wild-type control mice. (n=5)

| Amino Acid    | $+/+$  |           | $A^y/+$ |            | P value        |
|---------------|--------|-----------|---------|------------|----------------|
|               | Mean   | SD        | Mean    | SD         |                |
| Alanine       | 904.7  | +/- 176.0 | 1145.8  | +/- 276.5  | 0.15362        |
| Arginine      | 87.4   | +/- 22.0  | 58.3    | +/- 21.8   | 0.08855        |
| Asparagine    | 68.9   | +/- 25.8  | 70.0    | +/- 14.5   | 0.94376        |
| Aspartic Acid | 19.0   | +/- 3.0   | 26.5    | +/- 14.7   | 0.29406        |
| Citrulline    | 66.1   | +/- 23.0  | 91.4    | +/- 7.2    | 0.07432        |
| Cysteine      | 36.3   | +/- 9.7   | 20.9    | +/- 14.5   | 0.09656        |
| Glutamic Acid | 114.3  | +/- 88.5  | 231.8   | +/- 94.2   | 0.09552        |
| Glutamine     | 749.2  | +/- 190.5 | 840.8   | +/- 171.5  | 0.47907        |
| Glycine       | 501.9  | +/- 46.5  | 563.8   | +/- 120.7  | 0.32202        |
| Histidine     | 88.2   | +/- 24.4  | 86.1    | +/- 15.9   | 0.88980        |
| Isoleucine    | 98.7   | +/- 10.7  | 83.9    | +/- 7.7    | 0.05355        |
| Leucine       | 179.2  | +/- 16.3  | 195.3   | +/- 42.9   | 0.45943        |
| Lysine        | 296.1  | +/- 14.5  | 283.0   | +/- 60.1   | 0.64719        |
| Methionine    | 57.0   | +/- 12.6  | 37.4    | +/- 4.6    | <b>0.02183</b> |
| Ornithine     | 69.9   | +/- 25.9  | 107.1   | +/- 61.2   | 0.25337        |
| Phenylalanine | 90.0   | +/- 23.4  | 87.3    | +/- 9.9    | 0.83481        |
| Proline       | 117.8  | +/- 18.6  | 96.7    | +/- 19.1   | 0.13939        |
| Serine        | 173.9  | +/- 41.1  | 174.3   | +/- 36.5   | 0.98972        |
| Taurine       | 1595.8 | +/- 645.4 | 3205.4  | +/- 1202.9 | <b>0.03594</b> |
| Threonine     | 163.7  | +/- 26.9  | 158.1   | +/- 47.9   | 0.82874        |
| Tryptophan    | 22.4   | +/- 9.9   | 21.9    | +/- 7.5    | 0.94504        |
| Tyrosine      | 92.1   | +/- 25.1  | 82.9    | +/- 24.5   | 0.60154        |
| Urea          | 7467.4 | +/- 539.8 | 8275.1  | +/- 1594.1 | 0.31824        |
| Valine        | 228.4  | +/- 14.6  | 238.6   | +/- 58.6   | 0.71423        |

**Supplementary Table 5.** Plasma amino acid concentrations in wild-type mice fed a high-fat diet compared to normal chow. (n=5)

| Amino Acid    | Control    |        | HFD        |       | P value        |
|---------------|------------|--------|------------|-------|----------------|
|               | Mean       | SD     | Mean       | SD    |                |
| Alanine       | 565.0 +/-  | 293.9  | 969.2 +/-  | 106.6 | <b>0.04146</b> |
| Arginine      | 66.5 +/-   | 14.8   | 77.8 +/-   | 43.5  | 0.63990        |
| Asparagine    | 39.9 +/-   | 5.7    | 66.4 +/-   | 8.5   | <b>0.00207</b> |
| Aspartic Acid | 21.5 +/-   | 5.3    | 17.4 +/-   | 3.2   | 0.23116        |
| Citrulline    | 73.1 +/-   | 3.2    | 87.4 +/-   | 23.2  | 0.26948        |
| Cysteine      | 31.9 +/-   | 13.5   | 49.0 +/-   | 22.6  | 0.24149        |
| Glutamic Acid | 59.6 +/-   | 33.2   | 50.4 +/-   | 11.4  | 0.62032        |
| Glutamine     | 629.0 +/-  | 131.4  | 758.0 +/-  | 167.0 | 0.27021        |
| Glycine       | 338.6 +/-  | 73.7   | 374.6 +/-  | 63.4  | 0.48661        |
| Histidine     | 65.6 +/-   | 4.8    | 77.9 +/-   | 4.6   | <b>0.01048</b> |
| Isoleucine    | 83.2 +/-   | 26.4   | 87.7 +/-   | 17.8  | 0.78405        |
| Leucine       | 154.8 +/-  | 33.6   | 163.4 +/-  | 40.5  | 0.75520        |
| Lysine        | 213.0 +/-  | 39.9   | 321.3 +/-  | 25.6  | <b>0.00380</b> |
| Methionine    | 37.1 +/-   | 18.6   | 45.2 +/-   | 4.6   | 0.42924        |
| Ornithine     | 58.4 +/-   | 19.4   | 76.4 +/-   | 42.0  | 0.46712        |
| Phenylalanine | 69.4 +/-   | 14.2   | 69.7 +/-   | 14.1  | 0.97339        |
| Proline       | 74.3 +/-   | 31.0   | 111.8 +/-  | 14.5  | 0.07050        |
| Serine        | 97.6 +/-   | 19.4   | 154.8 +/-  | 21.5  | <b>0.00749</b> |
| Taurine       | 978.1 +/-  | 503.5  | 1420.4 +/- | 550.4 | 0.28057        |
| Threonine     | 114.1 +/-  | 23.4   | 166.1 +/-  | 18.3  | <b>0.01293</b> |
| Tryptophan    | 23.6 +/-   | 4.3    | 24.1 +/-   | 5.1   | 0.87813        |
| Tyrosine      | 57.9 +/-   | 13.1   | 69.3 +/-   | 12.9  | 0.25996        |
| Urea          | 8450.7 +/- | 1111.0 | 7024.5 +/- | 825.2 | 0.08493        |
| Valine        | 214.0 +/-  | 34.9   | 216.2 +/-  | 34.6  | 0.93121        |

**Supplementary Table 6.** Plasma amino acid concentrations in  $\Delta$ Gly-APN<sup>+/+</sup>,  $\Delta$ Gly-APN<sup>ob/ob</sup> and wild-type mice. (n=10, 16, and 5, respectively)

| Amino Acid    | +/+               |    | $\Delta$ Gly-APN <sup>+/+</sup> |    | $\Delta$ Gly-APN <sup>ob/ob</sup> |    | +/+ vs.<br>$\Delta$ Gly-APN <sup>+/+</sup> | +/+ vs.<br>$\Delta$ Gly-APN <sup>ob/ob</sup> | $\Delta$ Gly-APN <sup>+/+</sup> vs.<br>$\Delta$ Gly-APN <sup>ob/ob</sup> |
|---------------|-------------------|----|---------------------------------|----|-----------------------------------|----|--------------------------------------------|----------------------------------------------|--------------------------------------------------------------------------|
|               | Mean              | SD | Mean                            | SD | Mean                              | SD | P value                                    | P value                                      | P value                                                                  |
| Alanine       | 890.3 +/- 240.7   |    | 471.3 +/- 181.4                 |    | 543.7 +/- 66.0                    |    | <b>0.00925</b>                             | <b>0.00774</b>                               | 0.37962                                                                  |
| Arginine      | 74.8 +/- 43.3     |    | 79.3 +/- 31.9                   |    | 117.3 +/- 15.8                    |    | 0.84843                                    | 0.05130                                      | <b>0.02601</b>                                                           |
| Asparagine    | 56.0 +/- 18.1     |    | 92.1 +/- 62.0                   |    | 81.2 +/- 10.3                     |    | 0.24364                                    | <b>0.01724</b>                               | 0.68004                                                                  |
| Aspartic Acid | 29.6 +/- 22.1     |    | 19.7 +/- 7.3                    |    | 11.8 +/- 1.7                      |    | 0.32561                                    | 0.07905                                      | <b>0.02892</b>                                                           |
| Citrulline    | 94.4 +/- 18.5     |    | 20.6 +/- 4.0                    |    | 21.1 +/- 3.3                      |    | <b>0.00000</b>                             | <b>0.00000</b>                               | 0.81780                                                                  |
| Cysteine      | 43.2 +/- 19.8     |    | ND                              |    | ND                                |    | ND                                         | ND                                           | ND                                                                       |
| Glutamic Acid | 86.2 +/- 98.7     |    | 27.7 +/- 14.4                   |    | 24.7 +/- 4.0                      |    | 0.22413                                    | 0.15741                                      | 0.50605                                                                  |
| Glutamine     | 798.7 +/- 210.7   |    | 701.2 +/- 113.6                 |    | 792.0 +/- 106.0                   |    | 0.35163                                    | 0.94634                                      | 0.18288                                                                  |
| Glycine       | 367.0 +/- 120.2   |    | 281.7 +/- 34.8                  |    | 169.0 +/- 22.1                    |    | 0.12843                                    | <b>0.00312</b>                               | <b>0.00005</b>                                                           |
| Histidine     | 80.2 +/- 15.0     |    | 61.6 +/- 10.9                   |    | 75.5 +/- 7.1                      |    | <b>0.04139</b>                             | 0.50806                                      | <b>0.02639</b>                                                           |
| Isoleucine    | 114.5 +/- 28.4    |    | 85.8 +/- 20.3                   |    | 130.3 +/- 32.8                    |    | 0.08162                                    | 0.42226                                      | <b>0.01788</b>                                                           |
| Leucine       | 195.8 +/- 39.4    |    | 158.3 +/- 42.4                  |    | 223.2 +/- 50.6                    |    | 0.16665                                    | 0.35000                                      | <b>0.03682</b>                                                           |
| Lysine        | 320.3 +/- 59.4    |    | 254.4 +/- 60.3                  |    | 304.4 +/- 40.1                    |    | 0.10286                                    | 0.60963                                      | 0.12199                                                                  |
| Methionine    | 47.7 +/- 5.0      |    | 46.9 +/- 12.5                   |    | 53.5 +/- 21.2                     |    | 0.88739                                    | 0.57318                                      | 0.52678                                                                  |
| Ornithine     | 101.7 +/- 77.1    |    | 50.7 +/- 19.0                   |    | 41.6 +/- 8.0                      |    | 0.14830                                    | 0.08718                                      | 0.30670                                                                  |
| Phenylalanine | 84.8 +/- 17.5     |    | 85.9 +/- 15.7                   |    | 113.2 +/- 20.4                    |    | 0.91505                                    | <b>0.03763</b>                               | <b>0.02698</b>                                                           |
| Proline       | 114.4 +/- 37.8    |    | 66.7 +/- 27.6                   |    | 77.0 +/- 33.6                     |    | 0.05226                                    | 0.11567                                      | 0.59917                                                                  |
| Serine        | 132.5 +/- 25.6    |    | 117.7 +/- 24.9                  |    | 120.6 +/- 13.1                    |    | 0.35615                                    | 0.34236                                      | 0.80415                                                                  |
| Taurine       | 1456.9 +/- 1354.7 |    | 432.8 +/- 133.6                 |    | 551.1 +/- 152.4                   |    | 0.09563                                    | 0.13472                                      | 0.18353                                                                  |
| Threonine     | 152.6 +/- 27.9    |    | 114.2 +/- 30.6                  |    | 121.6 +/- 16.6                    |    | 0.05974                                    | <b>0.04791</b>                               | 0.61361                                                                  |
| Tryptophan    | 22.4 +/- 3.2      |    | 23.4 +/- 7.7                    |    | 21.0 +/- 7.0                      |    | 0.80663                                    | 0.68224                                      | 0.58782                                                                  |
| Tyrosine      | 73.6 +/- 14.4     |    | 82.3 +/- 24.4                   |    | 90.3 +/- 16.3                     |    | 0.50222                                    | 0.10840                                      | 0.51862                                                                  |
| Urea          | 7494.7 +/- 1156.3 |    | 6189.8 +/- 855.1                |    | 10087.2 +/- 1019.7                |    | 0.05959                                    | <b>0.00333</b>                               | <b>0.00003</b>                                                           |
| Valine        | 255.7 +/- 46.7    |    | 179.6 +/- 34.1                  |    | 268.5 +/- 43.3                    |    | <b>0.01219</b>                             | 0.64998                                      | <b>0.00273</b>                                                           |

**Supplementary Table 7.** Plasma amino acid concentrations in wild-type mice fed a high-leucine diet compared to normal chow. (n=8)

| Amino Acid    | Post-Prandial      |                    |                | Post-Absorptive  |                  |                | Fasted            |                    |                |
|---------------|--------------------|--------------------|----------------|------------------|------------------|----------------|-------------------|--------------------|----------------|
|               | Control            |                    | P value        | Control          |                  | P value        | Control           |                    | P value        |
|               | Mean               | SD                 |                | Mean             | SD               |                | Mean              | SD                 |                |
| Alanine       | 597.2 +/- 166.8    | 424.3 +/- 16.2     | 0.14854        | 666.9 +/- 42.8   | 641.8 +/- 92.5   | 0.69125        | 504.8 +/- 33.6    | 480.6 +/- 57.2     | 0.45775        |
| Arginine      | 87.2 +/- 18.9      | 80.1 +/- 10.7      | 0.60154        | 154.4 +/- 66.3   | 190.8 +/- 127.0  | 0.68286        | 83.0 +/- 15.4     | 69.2 +/- 6.1       | <b>0.04623</b> |
| Asparagine    | 81.2 +/- 32.3      | 59.0 +/- 4.6       | 0.30430        | 77.5 +/- 5.8     | 82.0 +/- 4.5     | 0.34793        | 55.4 +/- 17.8     | 60.2 +/- 6.1       | 0.48971        |
| Aspartic Acid | 15.9 +/- 3.7       | 10.4 +/- 1.8       | 0.08641        | 18.6 +/- 3.6     | 16.7 +/- 0.4     | 0.42491        | 30.8 +/- 12.2     | 23.8 +/- 5.5       | 0.18832        |
| Citrulline    | 92.3 +/- 11.5      | 114.4 +/- 6.5      | <b>0.04393</b> | 89.3 +/- 12.8    | 77.0 +/- 7.3     | 0.21951        | 77.3 +/- 13.4     | 66.6 +/- 10.7      | 0.16280        |
| Cysteine      | 43.0 +/- 23.3      | 30.6 +/- 12.0      | 0.45665        | ND               | ND               | ND             | 35.3 +/- 15.4     | 27.0 +/- 7.1       | 0.22106        |
| Glutamic Acid | 38.1 +/- 12.1      | 31.1 +/- 6.2       | 0.41979        | 115.1 +/- 4.9    | 101.5 +/- 22.7   | 0.36836        | 61.9 +/- 31.9     | 51.9 +/- 12.8      | 0.44070        |
| Glutamine     | 786.3 +/- 134.3    | 1066.0 +/- 48.3    | <b>0.02742</b> | 648.8 +/- 105.1  | 844.9 +/- 18.3   | <b>0.03344</b> | 773.1 +/- 121.6   | 737.8 +/- 80.9     | 0.55715        |
| Glycine       | 258.0 +/- 32.7     | 198.1 +/- 18.9     | 0.05186        | 338.1 +/- 52.2   | 276.0 +/- 23.7   | 0.13431        | 324.4 +/- 28.4    | 321.3 +/- 28.5     | 0.86542        |
| Histidine     | 98.4 +/- 27.0      | 83.2 +/- 5.6       | 0.39362        | 78.3 +/- 6.5     | 84.6 +/- 4.1     | 0.22646        | 73.7 +/- 8.3      | 76.6 +/- 5.6       | 0.47904        |
| Isoleucine    | 121.7 +/- 63.6     | 133.0 +/- 28.0     | 0.79345        | 93.5 +/- 3.9     | 79.1 +/- 3.4     | <b>0.00867</b> | 64.7 +/- 16.0     | 88.3 +/- 16.2      | <b>0.03838</b> |
| Leucine       | 216.7 +/- 108.9    | 2403.3 +/- 295.0   | <b>0.00027</b> | 167.4 +/- 18.0   | 478.1 +/- 55.2   | <b>0.00075</b> | 130.3 +/- 26.4    | 161.6 +/- 21.4     | 0.05071        |
| Lysine        | 504.4 +/- 110.9    | 330.0 +/- 39.3     | 0.06209        | 605.3 +/- 16.2   | 505.3 +/- 59.7   | <b>0.04871</b> | 369.3 +/- 65.7    | 272.3 +/- 31.3     | <b>0.00516</b> |
| Methionine    | 100.9 +/- 26.0     | 49.2 +/- 11.9      | <b>0.03549</b> | 105.8 +/- 10.2   | 86.4 +/- 9.2     | 0.07092        | 42.5 +/- 5.7      | 50.6 +/- 3.0       | <b>0.00795</b> |
| Ornithine     | 55.8 +/- 16.5      | 53.8 +/- 3.0       | 0.85219        | 74.0 +/- 12.2    | 91.7 +/- 45.4    | 0.54977        | 49.5 +/- 5.0      | 45.7 +/- 11.9      | 0.55498        |
| Phenylalanine | 93.2 +/- 31.5      | 75.1 +/- 2.1       | 0.37743        | 79.7 +/- 3.6     | 86.3 +/- 1.4     | <b>0.04227</b> | 59.4 +/- 7.1      | 71.7 +/- 9.1       | <b>0.04148</b> |
| Proline       | 269.5 +/- 154.5    | 150.4 +/- 10.8     | 0.25375        | 204.9 +/- 37.8   | 187.0 +/- 22.3   | 0.51915        | 82.5 +/- 21.2     | 79.5 +/- 11.9      | 0.75157        |
| Serine        | 176.5 +/- 36.5     | 122.8 +/- 8.0      | 0.06761        | 194.1 +/- 10.8   | 167.2 +/- 11.8   | <b>0.04360</b> | 153.7 +/- 26.3    | 152.2 +/- 16.3     | 0.90487        |
| Taurine       | 760.5 +/- 144.2    | 607.6 +/- 117.3    | 0.22724        | 1086.9 +/- 61.0  | 1006.2 +/- 141.3 | 0.41498        | 963.9 +/- 300.4   | 891.7 +/- 210.0    | 0.63493        |
| Threonine     | 322.6 +/- 69.4     | 246.3 +/- 39.4     | 0.17261        | 328.2 +/- 30.2   | 250.4 +/- 10.3   | <b>0.01341</b> | 182.5 +/- 31.5    | 192.0 +/- 25.8     | 0.58648        |
| Tryptophan    | 136.0 +/- 25.2     | 122.2 +/- 12.0     | 0.44063        | 128.5 +/- 17.6   | 124.0 +/- 22.2   | 0.79898        | 38.4 +/- 9.3      | 44.5 +/- 8.9       | 0.29854        |
| Tyrosine      | 132.6 +/- 37.2     | 55.6 +/- 5.8       | <b>0.02394</b> | 148.5 +/- 25.8   | 93.3 +/- 8.4     | <b>0.02443</b> | 63.5 +/- 15.9     | 69.6 +/- 12.1      | 0.47254        |
| Urea          | 10083.9 +/- 1607.8 | 12541.6 +/- 1452.2 | 0.12089        | 9690.9 +/- 267.0 | 13629.9 +/- 83.3 | <b>0.00002</b> | 9963.5 +/- 1685.2 | 12612.4 +/- 1621.8 | <b>0.02491</b> |
| Valine        | 413.5 +/- 144.2    | 486.2 +/- 85.4     | 0.49409        | 309.1 +/- 25.6   | 240.0 +/- 27.9   | <b>0.03424</b> | 209.2 +/- 28.2    | 207.7 +/- 24.1     | 0.92667        |
